# Supplementary material for: The Antimicrobial Susceptibility of Porphyromonas gingivalis: Genetic Repertoire, Global Phenotype, and Review of the Literature
Source: MDPI journal article supplement (doi:10.3390/antibiotics10121438), 2021-11-24
Supplement: s1 [file s1]

## Supplementary Material

**Table S1.** Strain information available for search on antimicrobial resistance genes.

| Experiment accession | Sample title                             | Name of isolate | Clinical type             | Isolation site | Geographical origin |
|----------------------|------------------------------------------|-----------------|---------------------------|----------------|---------------------|
| DRX019659            | Porphyromonas gingivalis ATCC 53977      | ATCC53977       | Periodontitis             | Subgingival    | USA                 |
| DRX019660            | Porphyromonas gingivalis D3              | D3              | Periodontitis, acute      | Subgingival    | Japan               |
| DRX019661            | Porphyromonas gingivalis D4              | D4              | Periodontitis, acute      | Subgingival    | Japan               |
| DRX019662            | Porphyromonas gingivalis D5              | D5              | Periodontitis, acute      | Subgingival    | Japan               |
| DRX019663            | Porphyromonas gingivalis D8              | D8              | Periodontitis, acute      | Subgingival    | Japan               |
| DRX019664            | Porphyromonas gingivalis D9              | D9              | Periodontitis, acute      | Subgingival    | Japan               |
| DRX019665            | Porphyromonas gingivalis D12             | D12             | Periodontitis, aggressive | Subgingival    | Japan               |
| DRX019666            | Porphyromonas gingivalis D26             | D26             | Periodontitis, aggressive | Subgingival    | Japan               |
| DRX019667            | Porphyromonas gingivalis D14             | D14             | Periodontitis, acute      | Subgingival    | Japan               |
| DRX019668            | Porphyromonas gingivalis D15             | D15             | Periodontitis, acute      | Subgingival    | Japan               |
| DRX019669            | Porphyromonas gingivalis D16             | D16             | Periodontitis, acute      | Subgingival    | Japan               |
| DRX019670            | Porphyromonas gingivalis D17             | D17             | Periodontitis, acute      | Subgingival    | Japan               |
| DRX019671            | Porphyromonas gingivalis D18             | D18             | Periodontitis, acute      | Subgingival    | Japan               |
| DRX019672            | Porphyromonas gingivalis D19             | D19             | Periodontitis, acute      | Subgingival    | Japan               |
| DRX019673            | Porphyromonas gingivalis D22             | D22             | Periodontitis, acute      | Subgingival    | Japan               |
| DRX019674            | Porphyromonas gingivalis D23             | D23             | Periodontitis, acute      | Subgingival    | Japan               |
| DRX019675            | Porphyromonas gingivalis D28             | D28             | Periodontitis, acute      | Subgingival    | Japan               |
| DRX019676            | Porphyromonas gingivalis D29             | D29             | Periodontitis, acute      | Subgingival    | Japan               |
| DRX019677            | Porphyromonas gingivalis D45             | D45             | Periodontitis, acute      | Subgingival    | Japan               |
| DRX019678            | Porphyromonas gingivalis D32             | D32             | Periodontitis, acute      | Subgingival    | Japan               |
| DRX019679            | Porphyromonas gingivalis D33             | D33             | Periodontitis, acute      | Subgingival    | Japan               |
| DRX019680            | Porphyromonas gingivalis D34             | D34             | Periodontitis, acute      | Subgingival    | Japan               |
| DRX019681            | Porphyromonas gingivalis D39             | D39             | Periodontitis, acute      | Subgingival    | Japan               |
| DRX019682            | Porphyromonas gingivalis D40             | D40             | Periodontitis, acute      | Subgingival    | Japan               |
| DRX019683            | Porphyromonas gingivalis D41             | D41             | Periodontitis, acute      | Subgingival    | Japan               |
| DRX019684            | Porphyromonas gingivalis PC9             | PC9             | Periodontitis, acute      | Subgingival    | Japan               |
| DRX019685            | Porphyromonas gingivalis PC13            | PC13            | Periodontitis, acute      | Subgingival    | Japan               |
| DRX019686            | Porphyromonas gingivalis FK2             | FK2             | Periodontitis, acute      | Subgingival    | Japan               |
| DRX019687            | Porphyromonas gingivalis KS14            | KS14            | Periodontitis, aggressive | Subgingival    | Japan               |
| DRX019688            | Porphyromonas gingivalis L1              | L1              | Periodontitis, acute      | Subgingival    | Japan               |
| DRX019689            | Porphyromonas gingivalis U54             | U54             | Periodontitis, acute      | Subgingival    | Japan               |
| DRX019690            | Porphyromonas gingivalis TDC59           | TDC59           | Periodontitis             | Subgingival    | Japan               |
| DRX019691            | Porphyromonas gingivalis TDC117          | TDC117          | Periodontitis             | Subgingival    | Japan               |
| DRX019692            | Porphyromonas gingivalis TDC129          | TDC129          | Periodontitis             | Subgingival    | Japan               |
| DRX019693            | Porphyromonas gingivalis TDC222          | TDC222          | Periodontitis             | Subgingival    | Japan               |
| DRX019694            | Porphyromonas gingivalis TDC225          | TDC225          | Periodontitis             | Subgingival    | Japan               |
| DRX019695            | Porphyromonas gingivalis TDC243          | TDC243          | Periodontitis             | Subgingival    | Japan               |
| DRX019696            | Porphyromonas gingivalis TDC260          | TDC260          | Periodontitis             | Subgingival    | Japan               |
| DRX019697            | Porphyromonas gingivalis TDC275          | TDC275          | Periodontitis             | Subgingival    | Japan               |
| DRX019698            | Porphyromonas gingivalis TDC280          | TDC280          | Periodontitis             | Subgingival    | Japan               |
| DRX019699            | Porphyromonas gingivalis HG184           | HG184           | NA                        | NA             | NA                  |
| DRX019700            | Porphyromonas gingivalis HG564           | HG564           | NA                        | NA             | NA                  |
| DRX019701            | Porphyromonas gingivalis HG1025          | HG1025          | NA                        | NA             | NA                  |
| DRX019702            | Porphyromonas gingivalis HW24D1          | HW24D1          | NA                        | NA             | NA                  |
| DRX019703            | Porphyromonas gingivalis ESO101          | ESO101          | NA                        | NA             | NA                  |
| DRX019704            | Porphyromonas gingivalis ESO132          | ESO132          | NA                        | NA             | NA                  |
| DRX019705            | Porphyromonas gingivalis OS30-2          | OS30-2          | NA                        | NA             | NA                  |
| DRX019706            | Porphyromonas gingivalis OS54-1          | OS54-1          | NA                        | NA             | NA                  |
| DRX019707            | Porphyromonas gingivalis OS61            | OS61            | NA                        | NA             | NA                  |
| DRX019708            | Porphyromonas gingivalis OMZ314          | OMZ314          | NA                        | NA             | NA                  |
| DRX019709            | Porphyromonas gingivalis Co5             | Co5             | Periodontitis, aggressive | Subgingival    | Japan               |
| DRX040827            | Porphyromonas gingivalis                 | Ando            | NA                        | NA             | Japan               |
| ERX1066718           | Genomic DNA Sequence of the oral bacteri | 3_3             | NA                        | Subgingival pl | USA                 |
| ERX1066719           | Genomic DNA Sequence of the oral bacteri | 3A1             | NA                        | Subgingival pl | Norway              |
| ERX1066720           | Genomic DNA Sequence of the oral bacteri | 7BTORR          | NA                        | Subgingival pl | USA                 |
| ERX1066721           | Genomic DNA Sequence of the oral bacteri | 11A             | NA                        | Subgingival pl | Romania             |
| ERX1066722           | Genomic DNA Sequence of the oral bacteri | 13_1            | NA                        | Subgingival pl | Sudan               |
| ERX1066723           | Genomic DNA Sequence of the oral bacteri | 15_9            | NA                        | Subgingival pl | Romania             |
| ERX1066724           | Genomic DNA Sequence of the oral bacteri | 84_3            | NA                        | Subgingival pl | Sudan               |
| ERX1066725           | Genomic DNA Sequence of the oral bacteri | 49417           | NA                        | Periodontal p  | Canada              |
| ERX1066726           | Genomic DNA Sequence of the oral bacteri | A7A1_28         | NA                        | Subgingival pl | USA                 |
| ERX1066727           | Genomic DNA Sequence of the oral bacteri | AFR5B1          | NA                        | Subgingival pl | Sudan               |
| ERX1066728           | Genomic DNA Sequence of the oral bacteri | YH522           | NA                        | Subgingival pl | Japan               |
| ERX1066730           | Genomic DNA Sequence of the oral bacteri | W50_ABK_WbaP    | NA                        | Subgingival pl | Germany             |
| ERX2022743           | 512915                                   | 512915          | Periodontitis             | Periodontitis  | The Netherlands     |
| ERX2022744           | 512919                                   | 512919          | Periodontitis             | Periodontitis  | The Netherlands     |
| ERX2022745           | 513125                                   | 513125          | Periodontitis             | Periodontitis  | The Netherlands     |
| ERX2022746           | 20663                                    | 20663           | Periodontitis             | Periodontitis  | The Netherlands     |
| ERX2022747           | 513324                                   | 513324          | Periodontitis             | Periodontitis  | The Netherlands     |
| ERX2022748           | 513044                                   | 513044          | Periodontitis             | Periodontitis  | The Netherlands     |
| ERX2022749           | 505759                                   | 505759          | Periodontitis             | Periodontitis  | The Netherlands     |
| ERX2022750           | MDS33                                    | MDS33           | Periodontitis             | Periodontitis  | The Netherlands     |
| ERX2022751           | 515430                                   | 515430          | Periodontitis             | Periodontitis  | The Netherlands     |
| ERX2069209           | 19X2-K1                                  | 19X2-K1         | Periodontitis             | Periodontitis  | The Netherlands     |
| SRX1437042           | PgW50-NIDCR                              | PgW50-NIDCR     | NA                        | NA             | USA                 |
| SRX1437565           | PgW50-ATCC                               | PgW50-ATCC      | NA                        | NA             | USA                 |
| SRX7089586           | ATCC33277                                | ATCC33277       | Gingival sulcus           | NA             | NA                  |
